# Supplementary material for: The Outcome of Induction Therapy for EBV-Related Hemophagocytic Lymphohistiocytosis: A Model for Risk Stratification
Source: PubMed Central journal article supplement (PMC9289144; doi:10.3389/fimmu.2022.876415), 2022-07-04
Supplement: DataSheet_1.pdf [file DataSheet_1.pdf]

## **Supplementary materials**

Supplementary materials to *The outcome of induction treatment in Epstein-Barr virus related hemophagocytic lymphohistiocytosis patients: a nomogram model to risk assessment*

**Supplementary table 1. Univariate Cox regression analysis for the risk factors associated with the death in induction treatment based on primary cohort**

|                               | HR   | 95% CI    | <i>P</i> value |
|-------------------------------|------|-----------|----------------|
| Male                          | 1.53 | 0.89-2.61 | 0.121          |
| Age >18 years                 | 1.48 | 1.04-2.13 | 0.031†         |
| Etoposide-based strategy      | 1.52 | 0.83-2.79 | 0.181          |
| Tuberculous infection history | 1.89 | 1.00-3.60 | 0.051          |
| Brain involvement             | 1.14 | 0.63-2.08 | 0.659          |
| Hepatosplenomegaly            | 0.93 | 0.65-1.34 | 0.705          |
| WBC count                     | 0.97 | 0.91-1.03 | 0.280          |
| Hemoglobin                    | 1.00 | 0.99-1.01 | 0.595          |
| Platelet count                | 1.00 | 1.00-1.00 | 0.483          |
| GGT                           | 1.00 | 1.00-1.00 | 0.040†         |
| ALP                           | 1.00 | 1.00-1.00 | 0.067          |
| Tbi                           | 1.00 | 1.00-1.00 | 0.160          |
| Dbi                           | 1.00 | 1.00-1.00 | 0.220          |
| Cr                            | 1.01 | 1.00-1.01 | 0.003†         |
| Bun                           | 1.08 | 1.03-1.13 | 0.003†         |
| ALB                           | 0.98 | 0.95-1.00 | 0.085          |
| Ca <sup>2+</sup>              | 0.67 | 0.32-1.37 | 0.268          |
| Na <sup>+</sup>               | 0.97 | 0.94-1.01 | 0.144          |
| Fibrinogen                    | 1.00 | 1.00-1.00 | 0.102          |
| PCT >2 ug/L                   | 1.05 | 1.01-1.10 | 0.028†         |
| sCD25                         | 1.07 | 1.02-1.12 | 0.004†         |
| EBV-DNA in PBMC               | 1.09 | 1.04-1.14 | <0.001†        |

†, the parameter was significant.

Abbreviation: HR, hazard ratio; WBC, white blood cell; GGT, gamma-glutamyl transpeptidase; ALP, alkaline phosphatase; Tbi, total bilirubin; Dbi, direct bilirubin; ALB, albumin; Cr, creatinine; Bun, blood urea nitrogen; PCT, procalcitonin; serum CD25; EBV, Epstein-Barr virus; DNA, deoxyribonucleic acid; PBMC, peripheral blood mononuclear cell; CTL, cytotoxic T lymphocyte.

**Supplementary table 2. Demographic and clinical information of EBV-HLH patients in the validation cohort**

| Characteristics                             | Death<br>n=10       | Survival<br>n=40    | <i>P</i> value     |
|---------------------------------------------|---------------------|---------------------|--------------------|
| Group categorized by nomogram – no. (%)     |                     |                     | 0.030 <sup>†</sup> |
| High-risk group                             | 5 (50.0%)           | 6 (15.0%)           |                    |
| Low-risk group                              | 5 (50.0%)           | 34 (85.0%)          |                    |
| Male – no. (%)                              | 7 (70.0%)           | 23 (57.5%)          | 0.475              |
| Age >18 years – no. (%)                     | 10 (100.0%)         | 28 (70.0%)          | 0.049 <sup>†</sup> |
| Treatment strategy – no. (%)                |                     |                     | 0.548              |
| Etoposide-based                             | 6 (60.0%)           | 28 (70.0%)          |                    |
| No etoposide-based                          | 4 (40.0%)           | 12 (30.0%)          |                    |
| Infection history – no. (%)                 |                     |                     |                    |
| Tuberculous                                 | 2 (20.0%)           | 1 (2.5%)            | 0.039 <sup>†</sup> |
| Other                                       | 8 (80.0%)           | 39 (97.5%)          | 1.000              |
| Brain involvement – no. (%)                 | 1 (10.0%)           | 3 (7.5%)            | 0.796              |
| Liver/spleen involvement – no. (%)          |                     |                     | 0.182              |
| Splénomegaly                                | 0 (0.0%)            | 1 (2.5%)            |                    |
| Hepatomegaly                                | 6 (60.0%)           | 13 (32.5%)          |                    |
| Hepatosplénomegaly                          | 4 (40.0%)           | 26 (65.0%)          |                    |
| Laboratory findings                         |                     |                     |                    |
| WBC count – m (IQR) – ×10 <sup>9</sup>      | 2.1 (1.3-3.0)       | 1.9 (1.4-3.1)       | 0.884              |
| Hemoglobin (g/l) – m (IQR)                  | 108 (101-122)       | 97 (79-114)         | 0.075              |
| platelet count – m (IQR) – ×10 <sup>9</sup> | 81.5 (28.0-164.0)   | 72.5 (31.5-125.5)   | 0.762              |
| ALT (U/l) – m (IQR)                         | 138.6 (51.2-370.0)  | 93.5 (53.0-255.0)   | 0.846              |
| AST (U/l) – m (IQR)                         | 261.7 (68.5-286.5)  | 87.3 (46.8-195.0)   | 0.174              |
| GGT (U/l) – m (IQR)                         | 132 (79-342)        | 164.5 (58.5-281)    | 0.725              |
| ALP (U/l) – m (IQR)                         | 406.5 (118.0-619.0) | 203.0 (129.0-573.0) | 0.482              |

|                                                  |                     |                     |                    |
|--------------------------------------------------|---------------------|---------------------|--------------------|
| Tbi ( $\mu\text{mol/l}$ ) – m (IQR)              | 26.0 (9.8-202.1)    | 18.7 (11.6-40.1)    | 0.309              |
| Dbi ( $\mu\text{mol/l}$ ) – m (IQR)              | 15.2 (1.9-100.0)    | 3.8 (2.1-15.0)      | 0.152              |
| Ibi ( $\mu\text{mol/l}$ ) – m (IQR)              | 11.3 (7.9-34.1)     | 11.3 (7.6-19.1)     | 0.314              |
| ALB (g/l) – m (IQR)                              | 29.4 (25.7-33.7)    | 30.0 (26.1-36.8)    | 0.389              |
| Cr ( $\mu\text{mol/l}$ ) – m (IQR)               | 50.2 (37.9-77.5)    | 47.8 (32.9-58.3)    | 0.452              |
| Bun (mmol/l) – m (IQR)                           | 4.3 (3.5-8.3)       | 4.9 (3.6-7.7)       | 0.619              |
| K <sup>+</sup> (mmol/l)– m (IQR)                 | 4.0 (3.8-4.1)       | 4.0 (3.8-4.2)       | 0.846              |
| Ca <sup>2+</sup> (mmol/l) – m (IQR)              | 2.0 (1.9-2.1)       | 2.1 (2.0-2.2)       | 0.409              |
| Na <sup>+</sup> (mmol/l) – m (IQR)               | 134.4 (128.1-137.9) | 137.6 (135.4-138.9) | 0.049 <sup>†</sup> |
| Fibrinogen (g/l) – m (IQR)                       | 1.42 (1.20-2.32)    | 1.42 (1.06-1.88)    | 0.671              |
| PCT >2 ug/l – no. (%)                            | 6 (60.0%)           | 37 (92.5%)          | 0.009 <sup>†</sup> |
| ESR (mm/H) – m (IQR)                             | 19 (8-47)           | 14 (9.5-24.5)       | 0.510              |
| Specific findings                                |                     |                     |                    |
| Hemophagocytosis – no. (%)                       | 6 (60.0%)           | 29 (72.5%)          |                    |
| Serum ferritin (ng/ml) – m (IQR) – $\times 10^3$ | 2.4 (1.3-11.6)      | 1.6 (1.0-12.2)      | 0.420              |
| sCD25 (pg/ml) – m (IQR) – $\times 10^4$          | 3.7 (1.0-4.4)       | 3.4 (1.4-4.4)       | 0.639              |
| The activity of NK cells (%) – m (IQR)           | 13.9 (10.1-17.4)    | 14.6 (12.8-16.9)    | 0.670              |
| EBV-DNA (copies/ml) – m (IQR), $\times 10^5$     |                     |                     |                    |
| Plasma                                           | 1.0 (0.1-3.1)       | 0.1 (0.1-9.7)       | 0.464              |
| PBMC                                             | 8.7 (1.1-31.0)      | 5.8 (1.6-29.0)      | 0.884              |
| NK-CD107a (%) – m (IQR)                          | 10.5 (7.2-27.8)     | 15.4 (8.6-24.3)     | 0.458              |
| CTL-CD107a (%) – m (IQR)                         | 5.4 (2.8-8.1)       | 3.3 (2.2-4.5)       | 0.231              |

<sup>†</sup>, the parameter was significant.

Abbreviation: WBC, white blood cell; ALT, glutamic-pyruvic transaminase; AST, glutamic oxalacetic transaminase; GGT, gamma-glutamyl transpeptidase; ALP, alkaline phosphatase; Tbi, total bilirubin; Dbi, direct bilirubin; Ibi, indirect bilirubin; ALB, albumin; Cr, creatinine; Bun, blood urea nitrogen; PCT, procalcitonin; ESR, erythrocyte sedimentation rate; serum CD25; NK cells, nature killer cells; EBV, Epstein-Barr virus; DNA, deoxyribonucleic acid; PBMC, peripheral blood mononuclear cell; CTL, cytotoxic T lymphocyte.

**Supplementary table 3. Univariate Cox regression analysis for the risk factors associated with the death in induction treatment based on the primary cohort**

|                               | HR   | 95% CI     | <i>P</i> value     |
|-------------------------------|------|------------|--------------------|
| Group categorized by nomogram |      |            | 0.012 <sup>†</sup> |
| High-risk group               | 4.93 | 1.42-17.11 |                    |
| Low-risk group                | 0.20 | 0.06-0.71  |                    |
| Age >18 years                 | -    | -          | -                  |
| Tuberculous infection         | 3.96 | 0.84-18.77 | 0.083              |
| Etoposide-based strategy      | 1.53 | 0.43-5.44  | 0.509              |
| Bun                           | 0.99 | 0.82-1.19  | 0.893              |
| PCT >2 ug/L                   | 6.96 | 1.94-25.03 | 0.003 <sup>†</sup> |
| sCD25                         | 1.00 | 1.00-1.00  | 0.833              |
| EBV-DNA in PBMC               | 1.00 | 1.00-1.00  | 0.138              |

-, the parameter couldn't be calculated.

<sup>†</sup>, the parameter was significant.

Abbreviation: HR, hazard ratio; PCT, procalcitonin; serum CD25; EBV, Epstein-Barr virus; DNA, deoxyribonucleic acid; PBMC, peripheral blood mononuclear cell.

**Supplementary table 4. Multivariate Cox regression analysis for the risk factors associated with the death in induction treatment based on validation cohort**

|                               | HR   | 95% CI     | <i>P</i> value |
|-------------------------------|------|------------|----------------|
| Group categorized by nomogram |      |            | 0.047          |
| High-risk group               | 3.89 | 1.02-14.84 |                |
| Low-risk group                | 0.26 | 0.07-0.98  |                |
| Treatment strategy            |      |            | 0.629          |
| Etoposide-based               | 1.43 | 0.33-6.19  |                |
| No etoposide-based            | 0.70 | 0.16-3.01  |                |
| Tuberculous infection         | 3.20 | 0.53-19.29 | 0.204          |

Abbreviation: HR, hazard ratio.
